# Supplementary material for: High Zika Virus Seroprevalence in Salvador, Northeastern Brazil Limits the Potential for Further Outbreaks
Source: PubMed Central journal article supplement (PMC5686533; doi:10.1128/mbio.01390-17), 2017-11-14
Supplement: mbo006173587sd1.pdf [file mbo006173587sd1.pdf]

# Supplementary material: Modelling results

*High seroprevalence against Zika virus in Salvador, north-eastern Brazil limits the potential for further outbreaks*

*Eduardo Martins Netto, Andres Moreira-Soto, Celia Pedroso, Christoph Höser, Sebastian Funk, Adam J. Kucharski, Alexandra Rockstroh, Beate M. Kümmerer, Gilmara Souza Sampaio, Estela Luz, Sara Nunes Vaz, Juarez Pereira Dias, Fernanda Anjos Bastos, Renata Cabral, Thomas Kistemann, Sebastian Ulbert, Xavier de Lamballerie, Thomas Jaenisch, Oliver J. Brady, Christian Drosten, Manoel Sarno, Carlos Brites, Jan Felix Drexler*

- Introduction
  - Required packages
- Model fitting
  - Generate posterior samples
- Prediction
- $R_0$  calculations
- Plots
  - Predictions
  - Parameter plots
- Session information

## Introduction

This document contains the R code necessary to reproduce the modelling results in “High seroprevalence against Zika virus in Salvador, north-eastern Brazil limits the potential for further outbreaks”.

# Required packages

Install required packages

```
cran_packages <- c("magrittr", "cowplot", "scales", "dplyr")
github_packages <- c("sbfknk/RBi.helpers")
```

```
for (package in cran_packages) {
  install.packages(package)
}

library("devtools")

for (package in github_packages) {
  install_github(package)
}
```

Load required packages

```
for (package in c(cran_packages, github_packages)) {
  library(tolower(sub("^.*/", "", package)), character.only = TRUE)
}
```

## Model fitting

## Generate posterior samples

Set the number of samples in the serological study

```
n_serology = 633
```

Read observations and model

```
model_dir <- path.expand("~/code/vbd/bi")  
obs <- readRDS("fit_data.rds")  
vbd_model <- bi_model(paste(model_dir, "vbd.bi", sep = "/"))
```

Set population size, initial population immune, and proportion of the population at risk to constants

```
vbd_model %<>% fix(N = 2675000, p_p_immune = 0.06, p_p_risk = 1)
```

Print data

```
obs
```

```
## $Incidence  
## # A tibble: 43 x 2  
##   time value  
##   <int> <dbl>  
## 1     1     9  
## 2     2     6  
## 3     3     8  
## 4     4     9  
## 5     5    18  
## 6     6    17  
## 7     7     7  
## 8     8    15
```

|    |    |    |      |
|----|----|----|------|
| ## | 9  | 9  | 14   |
| ## | 10 | 10 | 10   |
| ## | 11 | 11 | 43   |
| ## | 12 | 12 | 107  |
| ## | 13 | 13 | 147  |
| ## | 14 | 14 | 161  |
| ## | 15 | 15 | 298  |
| ## | 16 | 16 | 440  |
| ## | 17 | 17 | 408  |
| ## | 18 | 18 | 706  |
| ## | 19 | 19 | 777  |
| ## | 20 | 20 | 1020 |
| ## | 21 | 21 | 1033 |
| ## | 22 | 22 | 1143 |
| ## | 23 | 23 | 1100 |
| ## | 24 | 24 | 1272 |
| ## | 25 | 25 | 1265 |
| ## | 26 | 26 | 1595 |
| ## | 27 | 27 | 2371 |
| ## | 28 | 28 | 2886 |
| ## | 29 | 29 | 2470 |
| ## | 30 | 30 | 1962 |
| ## | 31 | 31 | 1603 |
| ## | 32 | 32 | 1159 |
| ## | 33 | 33 | 887  |
| ## | 34 | 34 | 681  |
| ## | 35 | 35 | 512  |
| ## | 36 | 36 | 495  |
| ## | 37 | 37 | 388  |
| ## | 38 | 38 | 366  |
| ## | 39 | 39 | 350  |

```
## 40    40    246
## 41    41    226
## 42    42    288
## 43    43    265
##
## $Serology
##   time value
## 1    66    401
```

## Print model

```
vbd_model
```

```
## bi_model:
## =====
## 1: model vbd {
## 2:   const p_p_risk = 1
## 3:   const p_p_immune = 0.06
## 4:   const N = 2675000
## 5:   param p_d_inc_h
## 6:   param p_d_inf_h
## 7:   param p_R0
## 8:   param p_p_rep
## 9:   param p_p_over
## 10:  param p_s_peak
## 11:  param p_s_amp
## 12:  param initI
## 13:  state S (has_output = 0)
## 14:  state E (has_output = 0)
## 15:  state I (has_output = 0)
```

```

## 16: state R (has_output = 0)
## 17: state Z (has_output = 0)
## 18: state beta_track
## 19: state Reff
## 20: input serology_sample
## 21: obs Incidence
## 22: obs Serology
## 23: sub parameter {
## 24:   p_d_inc_h ~ truncated_gaussian(mean = 17.8/7, std = 2.3/7, lower = 0)
## 25:   p_d_inf_h ~ truncated_gaussian(mean = 4.7/7, std = 1.2/7, lower = 0)
## 26:   p_R0 ~ uniform(lower = 0, upper = 25)
## 27:   p_s_amp ~ uniform(lower = 0, upper = 1)
## 28:   p_s_peak ~ gaussian(mean = 20, std = 2)
## 29:   p_p_rep ~ uniform(lower = 0, upper = 1)
## 30:   initI ~ gamma(shape = 1, scale = 10)
## 31:   p_p_over ~ beta(1, 10)
## 32: }
## 33: sub initial {
## 34:   S <- max(N * (1 - p_p_immune) * p_p_risk - initI, 0)
## 35:   E <- 0
## 36:   I <- initI
## 37:   R <- N * p_p_immune * p_p_risk
## 38:   Z <- 0
## 39:   beta_track <- p_R0/p_d_inf_h * (1 + p_s_amp*cos(6.283*(-p_s_peak)/52))
## 40:   Reff <- p_R0 * S / (N * p_p_risk) * (1 + p_s_amp*cos(6.283*(-p_s_peak)/52))
## 41: }
## 42: sub transition {
## 43:   inline incubation_rate = 1/p_d_inc_h
## 44:   inline recovery_rate = 1/p_d_inf_h
## 45:   inline infection_rate = p_R0/p_d_inf_h
## 46:   inline transmission_rate = infection_rate*(1+p_s_amp*cos(6.283*(t_now-p_s_peak)/52))

```

```

## 47:     beta_track <- transmission_rate
## 48:     Reff <- transmission_rate/recovery_rate * S/(N * p_p_risk)
## 49:     Z <- 0
## 50:     ode {
## 51:       dS/dt = -transmission_rate*S*I/(N*p_p_risk)
## 52:       dE/dt = +transmission_rate*S*I/(N*p_p_risk)-incubation_rate*E
## 53:       dI/dt = +incubation_rate*E-recovery_rate*I
## 54:       dR/dt = +recovery_rate*I
## 55:       dZ/dt = +incubation_rate*E
## 56:     }
## 57:   }
## 58:   sub observation {
## 59:     Incidence ~ truncated_gaussian(mean = p_p_rep * max(0, Z), std = sqrt(p_p_rep * max(
0, Z) / (1 - p_p_over)), lower=0)
## 60:     Serology ~ binomial(size = serology_sample, prob = R / (N * p_p_risk))
## 61:   }
## 62: }

```

Generate `libbi` object

```

bi <- libbi(vbd_model, input = list(serology_sample = n_serology), obs = obs,
  end_time = max(obs$Sero$time))

```

Generate prior samples (for plotting later)

```

bi_prior <- sample(bi, target = "prior", nsamples = 5000)
save_libbi(bi_prior, "salvador_prior.rds")

```

Generate and save posterior samples (after adapting the posterior distribution)

```
bi %<>% optimise() %>% sample(proposal = "prior", nsamples = 5000) %>% adapt_proposal(min = 0.1
,
  max = 0.4) %>% sample(sample_obs = TRUE, nsamples = 5e+05, thin = 50)
save_libbi(bi, "salvador.rds")
```

## Prediction

Use the posterior samples to predict up to week 80

```
pred <- predict(bi, end_time = 80, noutputs = 80, sample_obs = TRUE)
save_libbi(pred, "salvador_prediction.rds")
```

## $R_0$ calculations

Calculate  $R_0$  at the beginning of the outbreak

```
res <- bi_read(pred)
R0_calc <- copy(res[c("beta_track", "p_d_inf_h")])
R0_calc <- lapply(names(R0_calc), function(x) {
  setnames(R0_calc[[x]], "value", x)
})
R0_df <- data.table(merge(R0_calc[[1]], R0_calc[[2]]))
R0_df <- R0_df[time == 0]
R0_df <- R0_df[, `:=`(value, beta_track * p_d_inf_h)]
```

Summary statistics of  $R_0$  and the reporting rate.

```
mean(R0_df$value)
```



```
## [1] 2.137214
```

```
quantile(R0_df$value, c(0.025, 0.975))
```

```
##      2.5%      97.5%  
## 1.787868 2.597923
```

```
mean(res$p_rep$value)
```

```
## [1] 0.01990676
```

```
quantile(res$p_rep$value, c(0.025, 0.975))
```

```
##      2.5%      97.5%  
## 0.01761499 0.02249363
```

## Plots

## Predictions

Express serology as proportion immune (in results and) data

```
res$Serology %<>% mutate(value = value/n_serology)  
pred %<>% attach_file(file = "output", data = res, force = TRUE)
```

```

pred_obs <- bi_read(pred, file = "obs")
pred_obs$Serology %<>% mutate(value = value/n_serology)
pred %<>% attach_file(file = "obs", data = pred_obs, force = TRUE)

```

## Plot

```

common_plot_options <- list(x = pred, plot = FALSE, all.times = TRUE, select = list(time = 1:104),
  hline = c(Reff = 1), labels = c(beta_track = "beta", Reff = "R[eff]"), date.origin = as.Date("2015-01-05") -
  7, date.unit = "week")
p <- list()
p[["A"]] <- do.call(plot, c(common_plot_options, list(type = "obs", obs = "Incidence")))$trajectories +
  scale_y_continuous("Weekly incidence") + scale_x_date("", date_labels = "%b %Y")
p[["B"]] <- do.call(plot, c(common_plot_options, list(type = "obs", obs = "Serology")))$trajectories +
  scale_y_continuous("Percent immune", labels = percent) + scale_x_date("",
  date_labels = "%b %Y")
p[["C"]] <- do.call(plot, c(common_plot_options, list(type = "state", state = "beta_track")))$trajectories +
  scale_y_continuous("Transmission rate") + scale_x_date("", date_labels = "%b %Y")
p[["D"]] <- do.call(plot, c(common_plot_options, list(type = "state", state = "Reff")))$trajectories +
  scale_y_continuous("Reproduction number") + scale_x_date("", date_labels = "%b %Y")
plot <- do.call(plot_grid, c(p, list(labels = names(p), ncol = 2)))
plot

```

**A** 3000 |

**B** |

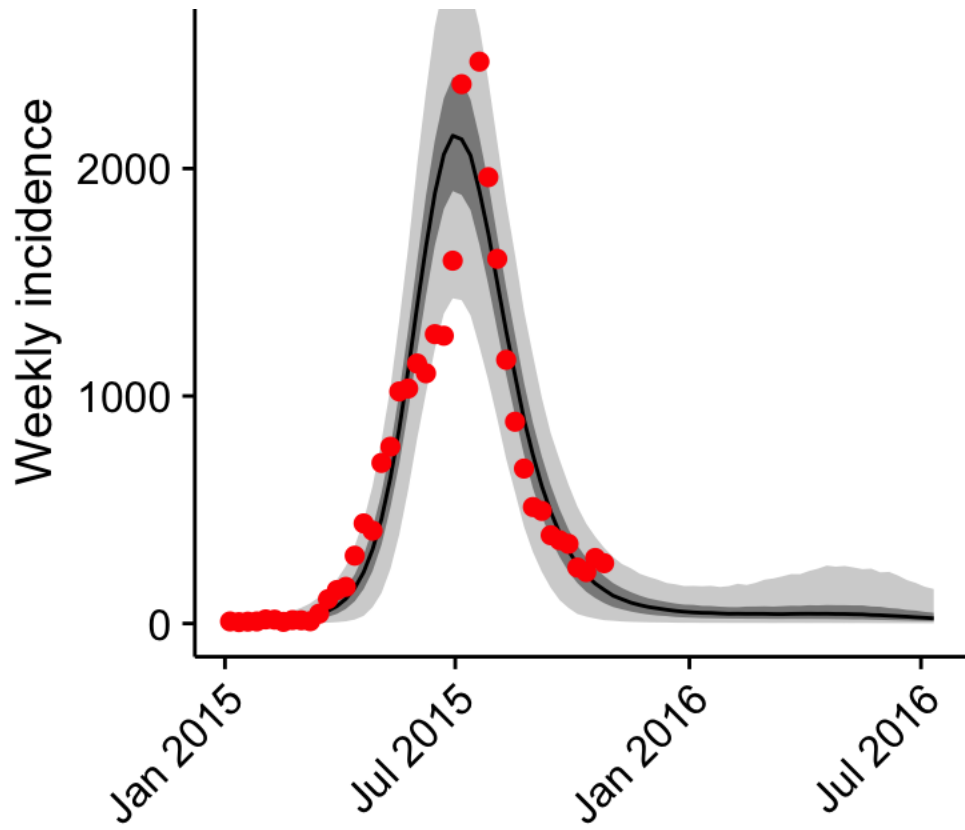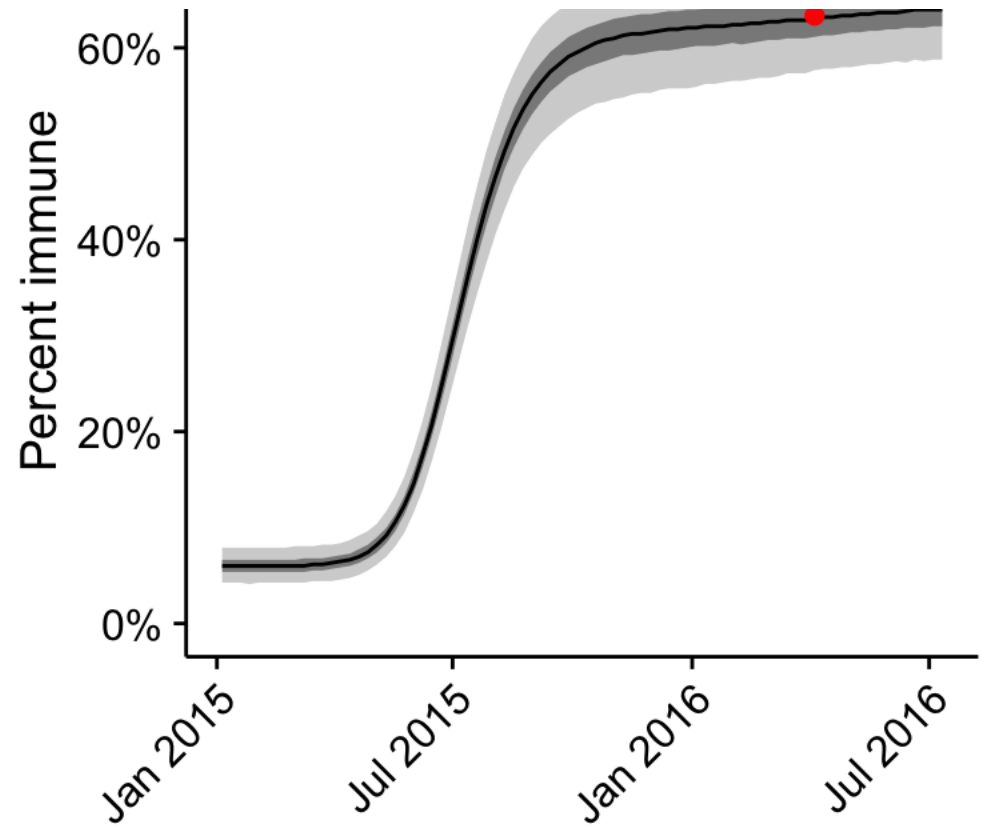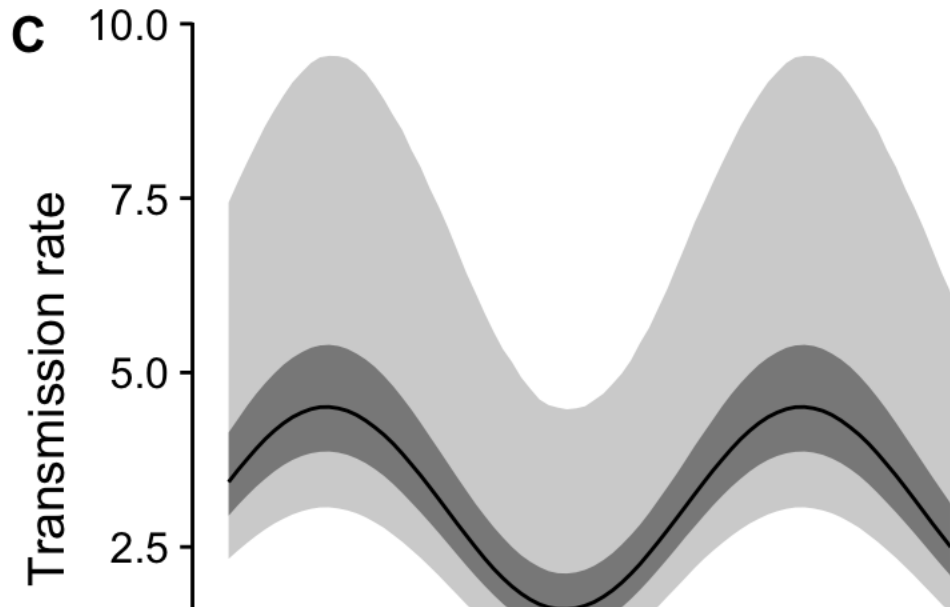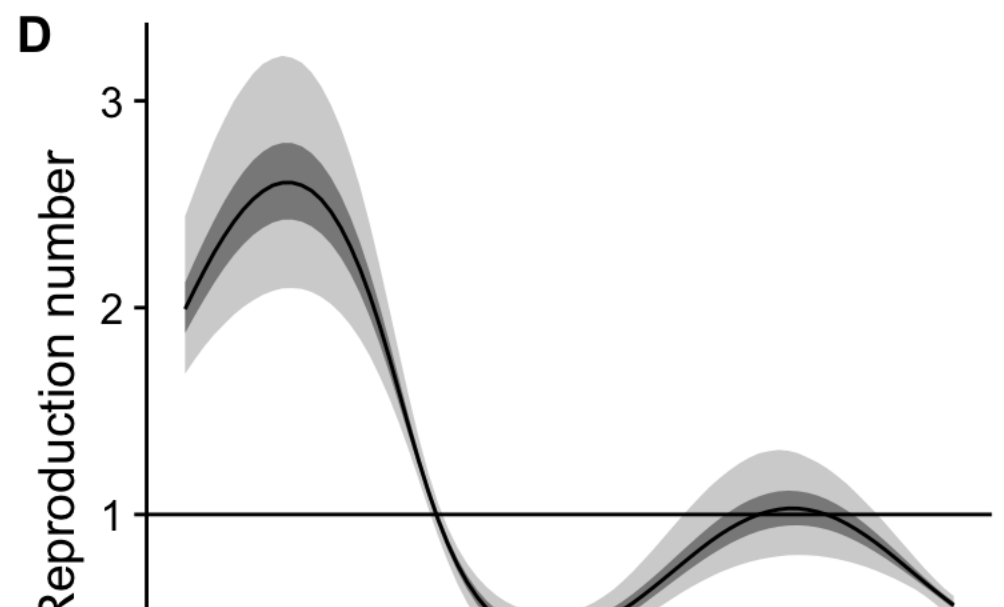

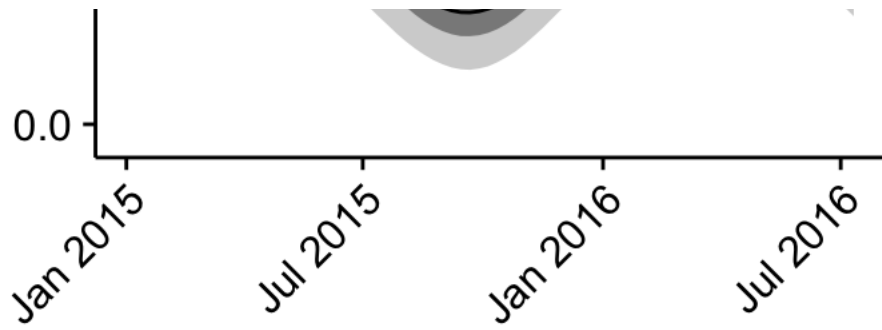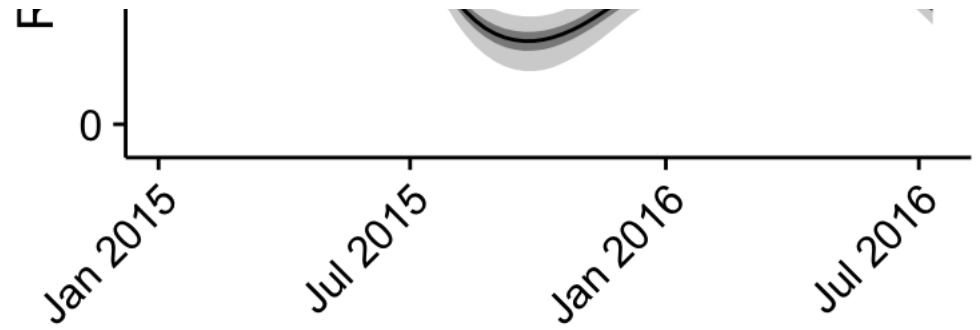

## Parameter plots

$\backslash(D\_mathrm{inc}\backslash)$ : duration between mosquito infection caused by a human and subsequent human case to become infectious.  $\backslash(D\_mathrm{inf}\backslash)$ : duration of human infectiousness.  $\backslash(R\_0\backslash)$ : basic reproduction number.  $\backslash(r\backslash)$ : proportion of cases reported.  $\backslash(\phi\backslash)$ : overdispersion of reporting. Peak week: Week of peak Zika transmission. Peak amplitude: Peak amplitude (as proportion of average transmission rate),  $\backslash(I\_0\backslash)$ : initial number of infectives.

```
p <- plot(pred, prior = bi_prior, type = c("param", "logeval"), labels = c(p_d_inc_h = "D[inc]"
,
  p_d_inf_h = "D[inf]", p_R0 = "R[0]", p_p_rep = "r", p_p_over = "phi", p_s_peak = "Peak~week"
"
,
  p_s_amp = "Peak~amplitude", initI = "I[0]"), pairs = FALSE, plot = FALSE)
```

Plot parameter densities

```
p$densities
```

distribution ■ posterior ■ prior

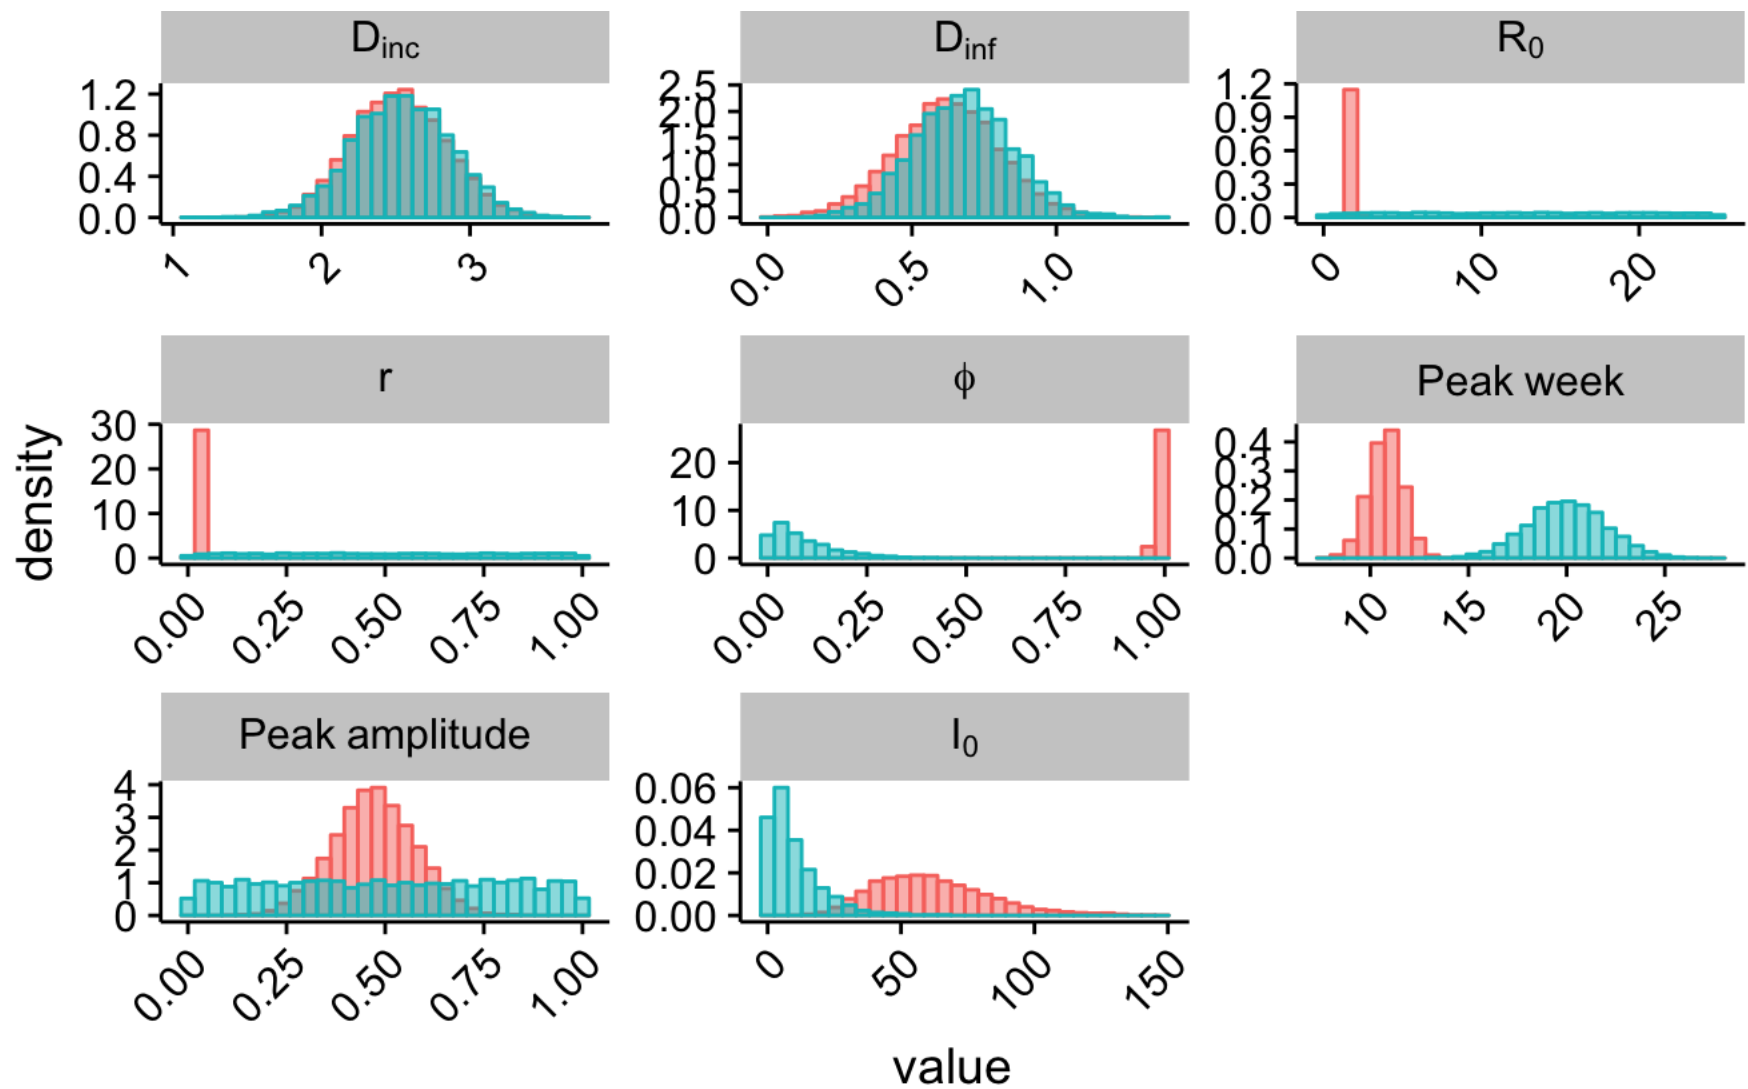

Plot parameter traces

```
p$traces
```

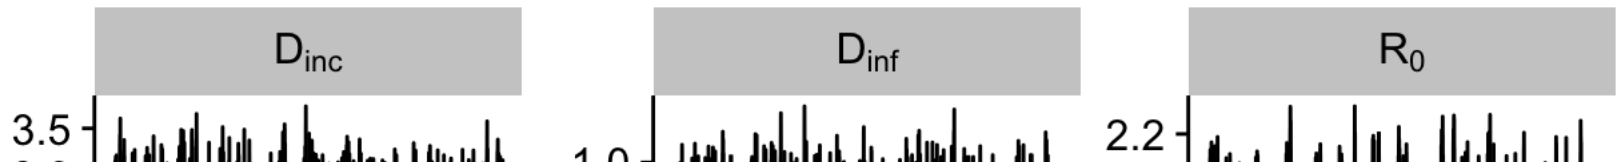

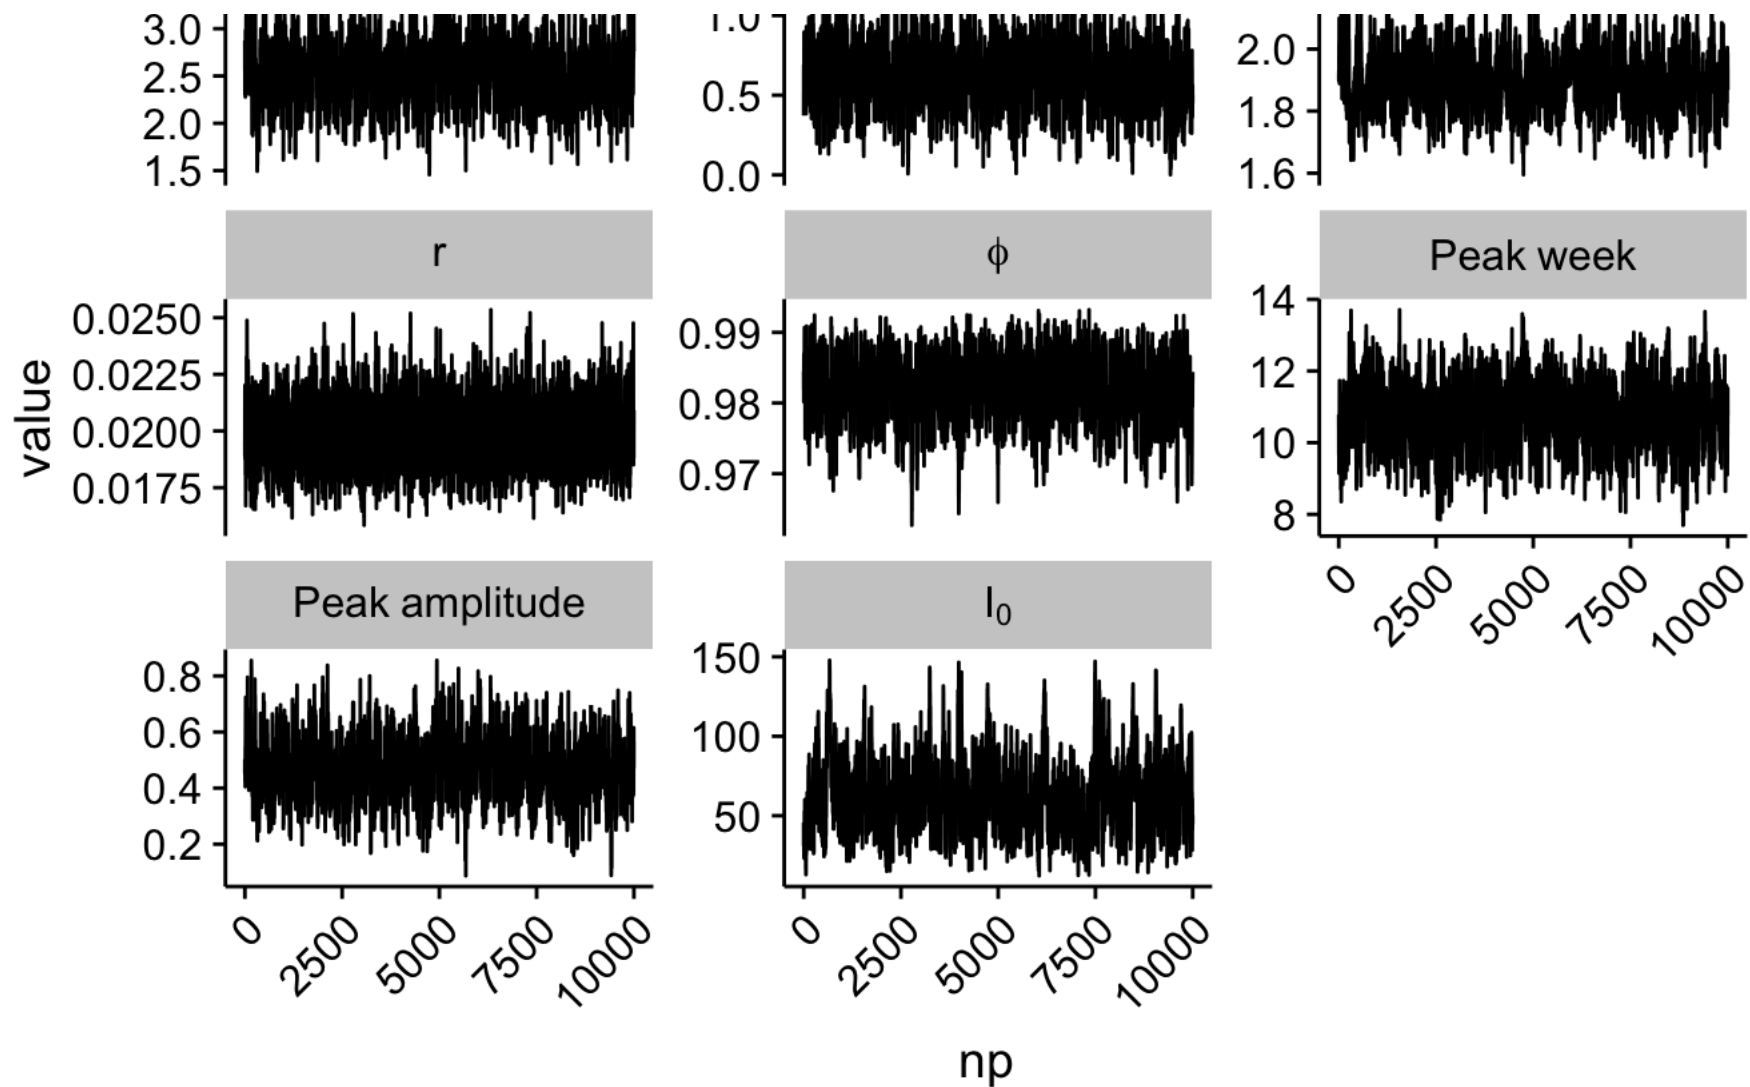

Plot paired correlations

```
p$correlations
```

1.0.

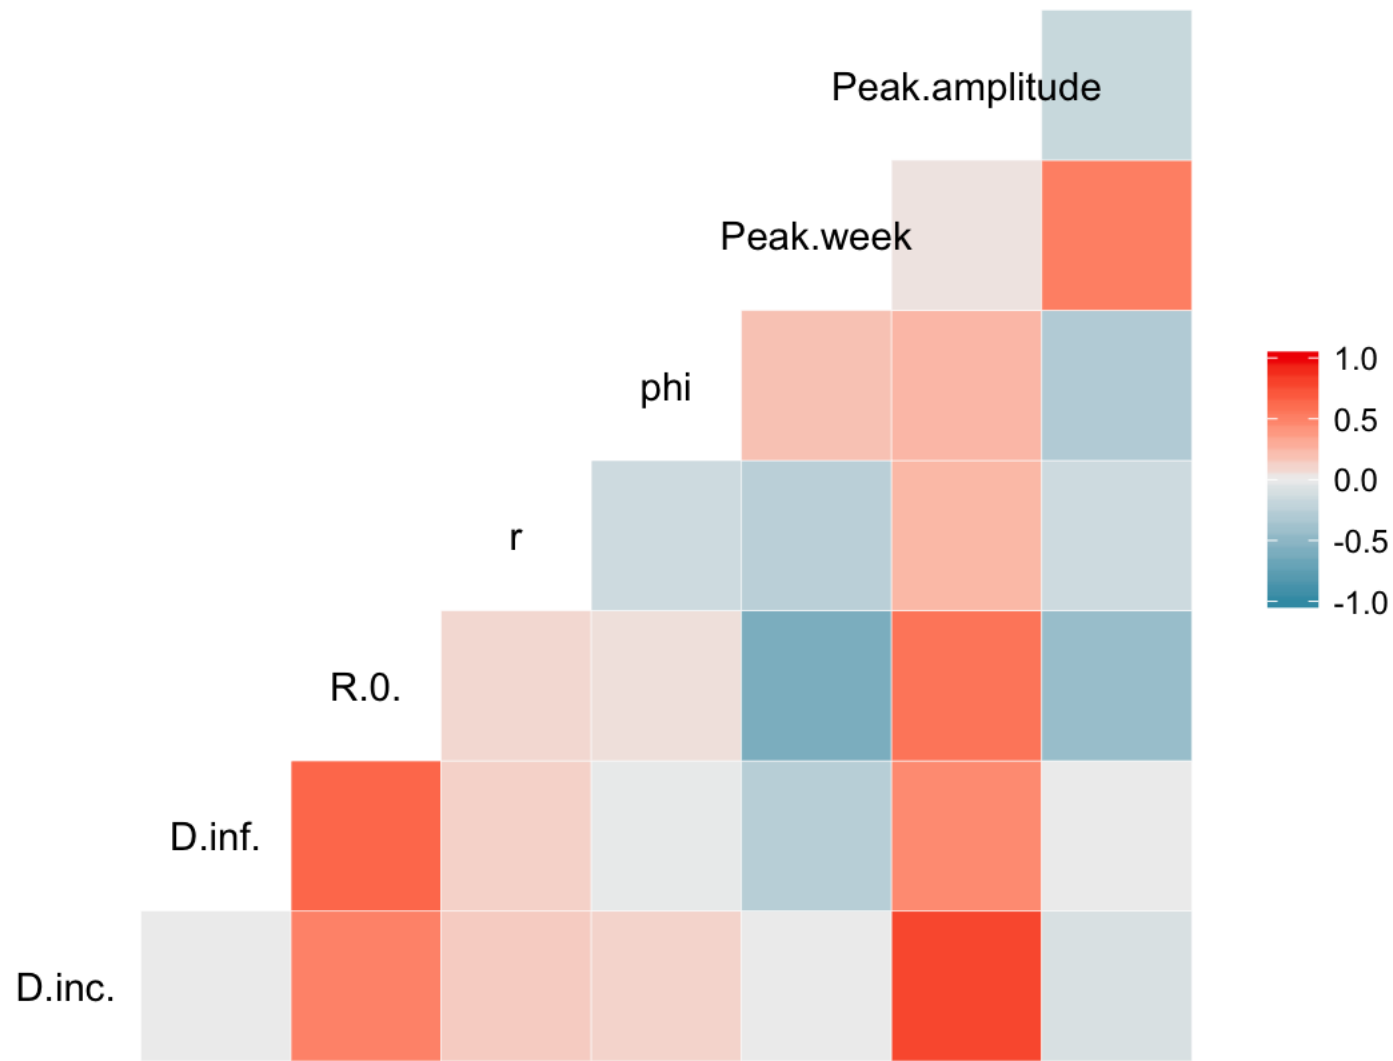

# Session information

```
sessionInfo()
```

```
## R version 3.4.1 (2017-06-30)
## Platform: x86_64-apple-darwin16.6.0 (64-bit)
```

```
## Running under: macOS Sierra 10.12.5
##
## Matrix products: default
## BLAS: /System/Library/Frameworks/Accelerate.framework/Versions/A/Frameworks/vecLib.framework
/Versions/A/libBLAS.dylib
## LAPACK: /System/Library/Frameworks/Accelerate.framework/Versions/A/Frameworks/vecLib.framewo
rk/Versions/A/libLAPACK.dylib
##
## locale:
## [1] en_GB.UTF-8/en_GB.UTF-8/en_GB.UTF-8/C/en_GB.UTF-8/en_GB.UTF-8
##
## attached base packages:
## [1] stats      graphics  grDevices datasets  utils      methods    base
##
## other attached packages:
## [1] bindrcpp_0.2      rbi.helpers_0.2   data.table_1.10.5
## [4] rbi_0.8.0         dplyr_0.7.2       scales_0.4.1
## [7] cowplot_0.7.0     ggplot2_2.2.1     magrittr_1.5
## [10] rmarkdown_1.5     Defaults_1.1-1
##
## loaded via a namespace (and not attached):
## [1] Rcpp_0.12.12      compiler_3.4.1    formatR_1.5
## [4] RColorBrewer_1.1-2 plyr_1.8.4         bindr_0.1
## [7] tools_3.4.1       ncd4_1.16         digest_0.6.12
## [10] lubridate_1.6.0   evaluate_0.10     tibble_1.3.3
## [13] gtable_0.2.0      lattice_0.20-35   pkgconfig_2.0.1
## [16] rlang_0.1.1       GGally_1.3.2      yaml_2.1.14
## [19] coda_0.19-1       stringr_1.2.0     knitr_1.15.1
## [22] rprojroot_1.2     grid_3.4.1        reshape_0.8.6
## [25] glue_1.1.1        R6_2.2.2          reshape2_1.4.2
## [28] backports_1.0.5   codetools_0.2-15  htmltools_0.3.6
```



```
## [31] assertthat_0.2.0    colorspace_1.3-2    labeling_0.3
## [34] stringi_1.1.5          lazyeval_0.2.0     munsell_0.4.3
```
