# Supplementary material for: High Zika Virus Seroprevalence in Salvador, Northeastern Brazil Limits the Potential for Further Outbreaks
Source: PubMed Central journal article supplement (PMC5686533; doi:10.1128/mbio.01390-17), 2017-11-14
Supplement: mbo006173587sf1.pdf [file mbo006173587sf1.pdf]

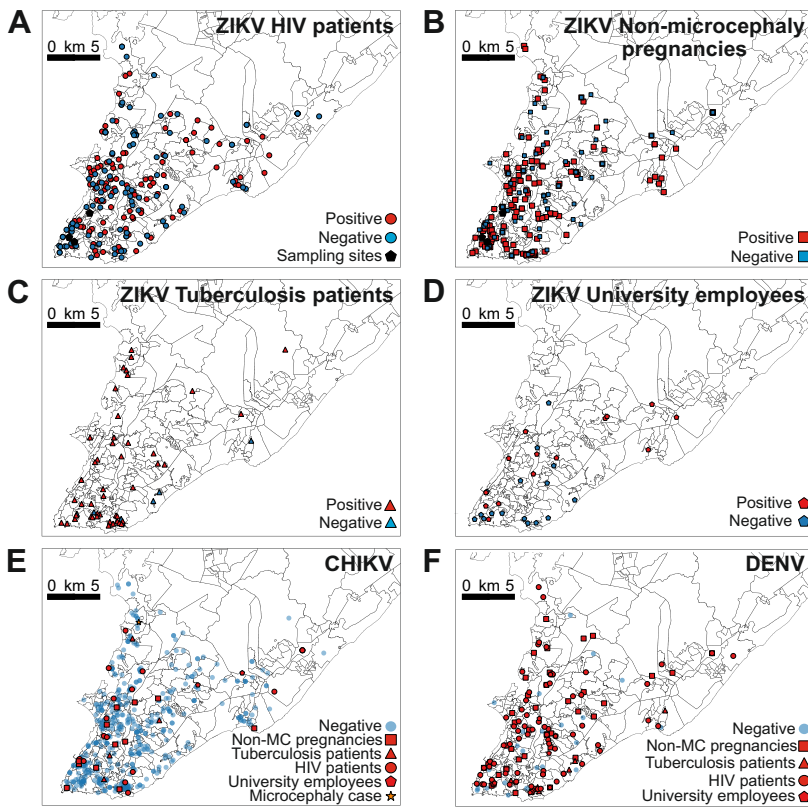

**Supplementary Figure 1. Spatial distribution of samples per subpopulation in Salvador, Bahia**

Panels A-D show origin of samples for all subpopulations, positive (red), negative (blue). Panels E and F show all positive samples in red and different shapes, whereas negative samples of all subpopulations are shown in shades of blue for clarity of presentation. Orange star in panel E shows the single CHIKV-positive microcephaly pregnancy. DENV includes only ZIKV-negative specimens due to cross-reactivity of the DENV ELISA with ZIKV antibodies. HIV-infected patients from 2013-2015 are not shown due to low ZIKV positivity.
