# Supplementary material for: High Zika Virus Seroprevalence in Salvador, Northeastern Brazil Limits the Potential for Further Outbreaks
Source: PubMed Central journal article supplement (PMC5686533; doi:10.1128/mbio.01390-17), 2017-11-14
Supplement: mbo006173587sf3.pdf [file mbo006173587sf3.pdf]

distribution ■ posterior ■ prior

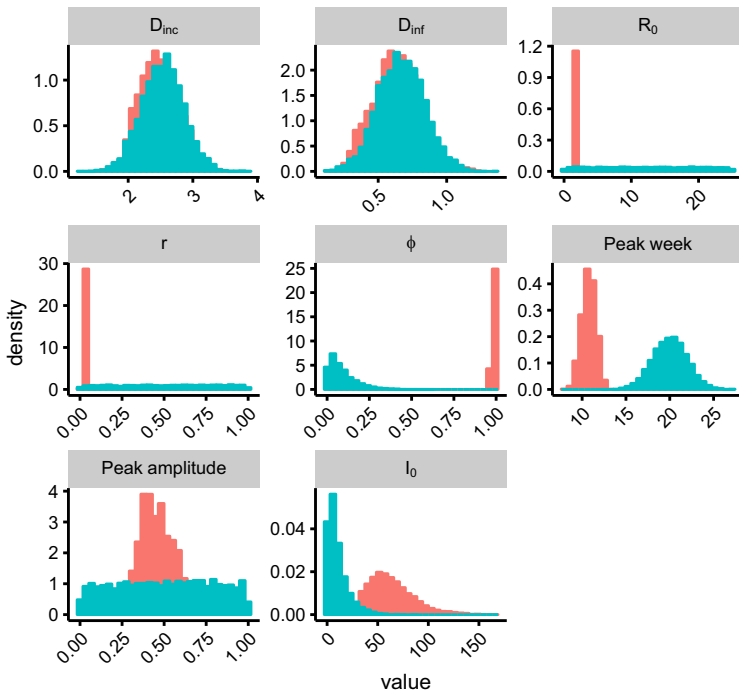

### Supplementary Figure 3. Parameter estimates for the fitted mathematical model

Posterior and prior parameter probability density plots for the model.  $D_{inc}$ : duration between mosquito infection caused by a human and subsequent human case to become infectious.  $D_{inf}$ : duration of human infectiousness.  $R_0$ : basic reproduction number.  $r$ : proportion of cases reported.  $\phi$ : overdispersion of reporting. Peak week: Week of peak Zika transmission. Peak amplitude: Peak amplitude (as proportion of average transmission rate),  $I_0$ : initial number of infectives.
